# Supplementary material for: The beneficial effect of physical activity on cognitive function in community-dwelling older persons with locomotive syndrome
Source: PeerJ. 2021 Oct 15;9:e12292. doi: 10.7717/peerj.12292 (PMC8522643; doi:10.7717/peerj.12292)
Supplement: Supplemental Information 1 [file peerj-09-12292-s001.xlsx]

## Sheet: copy final
ID	Sex(M,man;F,female)	age(y)	Locomo25 score[before] (points)	Locomo25 score[after] (points)	DLocomo25(points)	Classification of Loco25(0,<7, 1,>7)	ACE-R[before] (points)	ACE-R[after] (points)	DACE-R(points)	Classification of DACE-R(0,<0;1,>0)	Orientation/Attention[before] (points)	Orientation/Attention[after] (points)	DOrientation/Attention(points)	Memory[before] (points)	Memory[after] (points)	DMemory(points)	Verbal Fluency[before] (points)	Verbal Fluency[after] (points)	DVerbal Fluency(points)	Language[before] (points)	Language[after] (points)	DLanguage(points)	Visuospatial[before] (points)	Visuospatial[after] (points)	DVisuospatial(points)	Exercise habits(1,7days;2,5-6 days;3,1-4days;4,0days/week)	Years of education (y)	GDS-15 score[before] (points)	GDS-15 score[after] (points)	DGDS-15 score(points)	BMI[before] (kg/m2)	BMI[after](kg/m2)	DBMI(kg/m2)	SMI[before] (kg/m2)	SMI[after](kg/m2)	DSMI(kg/m2)	Ex(METs×h）	Ex classification（0, <2.29; 1,>2.29)
1	M	78	3	4	1	0	70	73	3	1	17	16	-1	18	20	2	11	7	-4	17	20	3	7	10	3	1	12	2	1	-1	17.8	17.5	-0.3	5.5	5.6	0.1	2.1	0
2	F	90	26	13	-13	1	81	84	3	1	17	18	1	14	17	3	12	11	-1	27	26	-1	11	12	1	3	8	3	1	-2	22.1	22.3	0.2	5.4	5.7	0.3	3.06	1
3	M	69	19	46	27	1	89	89	0	0	18	18	0	23	23	0	7	7	0	27	26	-1	14	15	1	3	12	1	3	2	28.6	28.5	-0.1	7.6	7.7	0.1	1.89	0
4	F	78	16	20	4	1	94	97	3	1	18	18	0	24	24	0	11	14	3	26	26	0	15	15	0	3	14	7	7	0	23.5	23.3	-0.2	5.4	5.5	0.1	2.29	1
5	F	71	4	5	1	0	95	92	-3	0	18	18	0	23	23	0	14	14	0	26	23	-3	14	14	0	3	14	1	1	0	32.5	31.4	-1.1	7.8	7.9	0.1	1.94	0
6	F	74	20	17	-3	1	93	83	-10	0	18	18	0	24	15	-9	13	11	-2	25	23	-2	13	16	3	3	12	6	5	-1	23	22.6	-0.4	6.4	6.4	0	1.51	0
7	F	81	11	24	13	1	92	97	5	1	18	18	0	21	23	2	14	14	0	25	26	1	14	16	2	3	9	2	1	-1	25.4	24.9	-0.5	5.3	5.5	0.2	0.66	0
8	F	79	0	0	0	0	91	90	-1	0	18	17	-1	19	22	3	12	12	0	27	26	-1	15	16	1	3	12	1	0	-1	21.2	21.1	-0.1	5	5.1	0.1	0.64	0
9	F	77	0	0	0	0	77	70	-7	0	15	18	3	15	13	-2	10	6	-4	25	21	-4	12	14	2	1	9	4	4	0	21.9	22.3	0.4	5.3	5.4	0.1	1.41	0
10	F	77	4	1	-3	0	80	81	1	1	16	17	1	18	13	-5	8	9	1	25	26	1	13	16	3	3	9	5	3	-2	27.9	27.4	-0.5	7	7	0	1.33	0
11	F	65	14	10	-4	1	96	95	-1	0	18	18	0	24	24	0	13	14	1	26	24	-2	15	15	0	4	12	2	1	-1	23.9	22.5	-1.4	5.5	5.5	0	1.2	0
12	F	81	14	11	-3	1	80	77	-3	0	18	16	-2	12	14	2	14	13	-1	21	18	-3	15	16	1	4	12	5	4	-1	20.4	19.8	-0.6	5.4	5.5	0.1	2.77	1
13	F	74	9	11	2	1	90	82	-8	0	18	18	0	22	12	-10	11	11	0	24	25	1	15	16	1	3	9	3	3	0	19.9	19.7	-0.2	6.5	6.6	0.1	2.18	0
14	F	78	14	15	1	1	99	99	0	0	18	18	0	25	26	1	14	14	0	27	25	-2	15	16	1	4	18	1	2	1	22	21.1	-0.9	5.7	5.6	-0.1	1.81	0
15	F	84	30	22	-8	1	70	75	5	1	14	18	4	15	13	-2	9	9	0	20	19	-1	12	16	4	1	13	3	4	1	31	29.8	-1.2	7.4	7.2	-0.2	1.59	0
16	F	73	31	23	-8	1	97	97	0	0	18	18	0	23	23	0	14	14	0	27	26	-1	15	16	1	3	16	4	4	0	20.2	20.3	0.1	5.4	5.7	0.3	1.13	0
17	M	91	4	4	0	0	77	79	2	1	17	16	-1	14	14	0	7	9	2	25	25	0	14	15	1	1	15	1	5	4	24.3	23.3	-1	7	7.1	0.1	1.32	0
18	F	81	6	7	1	0	94	91	-3	0	18	17	-1	25	22	-3	11	11	0	25	25	0	15	16	1	3	14	1	0	-1	25.6	25.3	-0.3	6.6	6.6	0	4.26	1
19	F	69	4	3	-1	0	96	99	3	1	17	18	1	24	25	1	14	14	0	26	26	0	15	16	1	4	14	9	8	-1	22	21.9	-0.1	5.6	5.6	0	1.42	0
20	F	79	3	2	-1	0	94	99	5	1	18	18	0	23	25	2	12	14	2	26	26	0	15	16	1	3	12	2	1	-1	22.3	22.1	-0.2	5.6	5.6	0	2.65	1
21	M	74	1	1	0	0	96	93	-3	0	18	18	0	25	22	-3	14	13	-1	25	24	-1	14	16	2	3	16	3	2	-1	21.5	21.4	-0.1	7.6	7.8	0.2	2.73	1
22	F	73	4	4	0	0	100	100	0	0	18	18	0	26	26	0	14	14	0	27	26	-1	15	16	1	3	10	1	0	-1	25.7	26.1	0.4	5.3	5.4	0.1	1.37	0
23	F	72	4	5	1	0	95	93	-2	0	18	18	0	25	20	-5	13	14	1	26	26	0	13	15	2	3	9	2	1	-1	21.9	21.8	-0.1	5.6	5.7	0.1	1.35	0
24	F	76	1	3	2	0	88	88	0	0	17	18	1	21	21	0	12	10	-2	24	23	-1	14	15	1	3	12	3	4	1	24.9	24.6	-0.3	6.8	7	0.2	5.87	1
25	M	66	1	0	-1	0	90	96	6	1	18	18	0	24	25	1	7	11	4	26	26	0	15	16	1	3	17	0	1	1	20.7	20.7	0	7.3	7.3	0	2.72	1
26	F	63	1	1	0	0	100	97	-3	0	18	18	0	26	23	-3	14	14	0	27	26	-1	15	16	1	3	16	2	1	-1	20.1	20	-0.1	5.3	5.4	0.1	2.05	0
27	F	69	3	4	1	0	94	95	1	1	17	18	1	24	21	-3	11	14	3	27	26	-1	15	16	1	3	12	7	10	3	24.2	24.2	0	5.9	6.1	0.2	2.43	1
28	F	68	6	7	1	0	89	95	6	1	18	18	0	22	22	0	12	14	2	24	24	0	13	14	1	1	12	0	0	0	18.6	18.4	-0.2	4.7	4.8	0.1	4.29	1
29	F	73	2	0	-2	0	100	97	-3	0	18	17	-1	26	24	-2	14	14	0	27	26	-1	15	16	1	1	12	0	0	0	21.2	21.3	0.1	5.8	5.8	0	4.44	1
30	F	67	5	3	-2	0	93	93	0	0	17	18	1	24	24	0	13	14	1	25	22	-3	14	15	1	3	13	1	0	-1	26.9	25.9	-1	6.4	6.4	0	1.32	0
31	F	74	1	0	-1	0	89	88	-1	0	18	18	0	20	19	-1	14	12	-2	22	23	1	15	16	1	1	12	0	0	0	26.7	26.6	-0.1	6.3	6.7	0.4	3.35	1
32	F	72	1	0	-1	0	91	97	6	1	18	18	0	24	24	0	10	14	4	25	25	0	14	16	2	3	12	0	0	0	19.1	18.7	-0.4	5.5	5.5	0	2.56	1
33	F	71	5	6	1	0	99	100	1	1	18	18	0	25	26	1	14	14	0	27	26	-1	15	16	1	2	12	6	3	-3	23	23	0	6.3	6.6	0.3	2.37	1
34	M	70	6	4	-2	0	90	92	2	1	18	16	-2	21	22	1	13	14	1	24	24	0	14	16	2	3	12	5	0	-5	26.6	26.3	-0.3	7.8	7.9	0.1	4.94	1
35	M	81	1	1	0	0	85	89	4	1	17	18	1	18	19	1	12	14	2	23	22	-1	15	16	1	1	17	0	1	1	26.4	26.1	-0.3	7	7.3	0.3	4.71	1
36	M	81	0	10	10	0	84	78	-6	0	18	14	-4	18	16	-2	8	11	3	25	23	-2	15	14	-1	4	9	2	2	0	27.1	25.7	-1.4	7.9	7.8	-0.1	1.45	0
37	F	78	4	3	-1	0	92	92	0	0	18	18	0	20	22	2	14	11	-3	26	24	-2	14	16	2	3	9	0	0	0	23	22.9	-0.1	5.3	5.5	0.2	3.33	1
38	F	75	1	0	-1	0	90	83	-7	0	18	18	0	17	14	-3	14	11	-3	26	25	-1	15	16	1	3	12	0	0	0	21.7	21.3	-0.4	5.8	5.7	-0.1	2.52	1
39	F	79	13	13	0	1	93	98	5	1	18	17	-1	20	25	5	14	14	0	26	26	0	15	16	1	3	12	4	5	1	21.4	21.3	-0.1	5.6	5.5	-0.1	2.69	1
40	M	73	3	4	1	0	93	92	-1	0	18	18	0	22	20	-2	14	14	0	25	25	0	14	15	1	3	12	0	1	1	20.9	21	0.1	7.5	7.7	0.2	4.13	1
41	F	75	2	3	1	0	98	99	1	1	18	18	0	25	25	0	14	14	0	26	26	0	15	16	1	3	12	2	2	0	22.8	22.1	-0.7	6.2	6.2	0	2.42	1
42	M	78	18	26	8	1	76	77	1	1	16	16	0	11	13	2	11	13	2	26	23	-3	12	12	0	1	12	1	1	0	24.3	24.3	0	6.9	7	0.1	3.18	1
43	F	72	2	2	0	0	90	93	3	1	18	18	0	19	20	1	14	14	0	25	25	0	14	16	2	3	12	5	3	-2	23	22.9	-0.1	5.3	5.4	0.1	3.71	1
44	F	71	2	0	-2	0	96	98	2	1	18	18	0	24	25	1	14	14	0	25	25	0	15	16	1	1	12	1	1	0	17.6	17.7	0.1	4.4	4.4	0	3.37	1
45	F	68	0	0	0	0	88	92	4	1	18	18	0	21	25	4	12	8	-4	23	23	0	14	16	2	2	12	2	2	0	21.3	20.6	-0.7	5.6	5.7	0.1	2.07	0
46	F	68	3	2	-1	0	99	89	-10	0	18	17	-1	25	20	-5	14	12	-2	27	24	-3	15	16	1	4	11	4	3	-1	22.8	22.4	-0.4	6.1	6.1	0	3.3	1
47	F	74	2	4	2	0	90	94	4	1	18	18	0	21	26	5	13	11	-2	24	23	-1	14	16	2	3	12	2	2	0	21.1	20.9	-0.2	5.4	5.4	0	2.06	0
48	F	79	13	17	4	1	90	85	-5	0	18	18	0	22	17	-5	9	8	-1	26	26	0	15	16	1	3	12	4	1	-3	23	23.2	0.2	5.4	5.4	0	0.59	0
49	F	76	4	12	8	0	94	96	2	1	18	17	-1	24	24	0	12	14	2	26	25	-1	14	16	2	3	15	1	0	-1	23.2	22.5	-0.7	6.2	6.1	-0.1	3.52	1
50	F	75	2	2	0	0	99	96	-3	0	18	18	0	26	22	-4	14	14	0	27	24	-3	14	15	1	3	12	2	0	-2	21.3	20.9	-0.4	5.3	5.5	0.2	3.88	1
51	F	74	2	6	4	0	84	71	-13	0	18	16	-2	18	12	-6	9	8	-1	25	23	-2	14	12	-2	4	9	2	3	1	22.2	22.7	0.5	5.5	5.8	0.3	1.71	0
52	F	70	7	3	-4	1	89	91	2	1	18	17	-1	21	18	-3	10	14	4	26	26	0	14	16	2	3	14	4	2	-2	23.3	23.5	0.2	5.3	5.5	0.2	5.05	1
53	F	73	20	30	10	1	87	81	-6	0	17	17	0	20	13	-7	13	14	1	24	24	0	13	13	0	3	12	6	2	-4	22	21.6	-0.4	5	5	0	2	0
54	F	71	2	3	1	0	96	94	-2	0	18	18	0	24	24	0	13	13	0	26	25	-1	15	16	1	3	19	1	2	1	21.7	21.2	-0.5	5.7	5.8	0.1	2.16	0
55	F	79	18	20	2	1	83	94	11	1	16	18	2	16	19	3	13	14	1	23	24	1	15	16	1	4	9	3	1	-2	22.3	22.2	-0.1	4.9	5	0.1	2.48	1
56	M	72	1	0	-1	0	91	95	4	1	17	18	1	21	26	5	14	11	-3	27	25	-2	12	15	3	1	16	0	2	2	22.2	21.8	-0.4	7.4	7.5	0.1	6.3	1
57	F	70	4	5	1	0	97	94	-3	0	18	18	0	24	21	-3	14	14	0	26	25	-1	15	16	1	3	12	9	8	-1	20.9	20.8	-0.1	5.4	5.6	0.2	2.55	1
58	F	80	6	7	1	0	98	97	-1	0	18	18	0	26	25	-1	13	13	0	27	25	-2	14	16	2	4	12	6	2	-4	23.6	23.3	-0.3	6.1	6.1	0	1.03	0
59	F	69	5	9	4	0	96	97	1	1	18	18	0	25	24	-1	12	14	2	26	25	-1	15	16	1	3	12	3	7	4	21	20.7	-0.3	5.3	5.4	0.1	4.17	1
60	M	71	18	8	-10	1	96	98	2	1	17	18	1	26	26	0	13	14	1	26	26	0	14	16	2	4	15	2	1	-1	28.3	27	-1.3	8.3	8.2	-0.1	5.74	1
61	F	76	10	6	-4	1	98	91	-7	0	18	18	0	25	20	-5	14	13	-1	26	25	-1	15	15	0	2	12	2	1	-1	25.5	25.1	-0.4	5.9	5.7	-0.2	2.1	0
62	M	80	4	4	0	0	94	91	-3	0	18	18	0	23	19	-4	14	13	-1	26	26	0	13	15	2	4	13	11	11	0	21.5	21.6	0.1	6.9	7	0.1	3.18	1
63	F	75	2	5	3	0	77	84	7	1	18	17	-1	9	15	6	12	12	0	23	25	2	15	14	-1	3	8	3	2	-1	21.3	21.1	-0.2	5.2	5.2	0	0.44	0
64	F	77	7	4	-3	1	96	93	-3	0	17	18	1	23	26	3	14	9	-5	27	26	-1	15	14	-1	3	10	10	4	-6	18.1	18	-0.1	4.9	5	0.1	2.93	1
65	F	75	32	25	-7	1	89	95	6	1	17	18	1	19	25	6	14	12	-2	25	25	0	14	15	1	3	9	6	7	1	22.8	22.6	-0.2	5.8	5.9	0.1	3.02	1
66	M	82	0	30	30	0	75	70	-5	0	17	17	0	16	12	-4	2	3	1	26	25	-1	14	16	2	1	12	4	2	-2	23.5	24.1	0.6	6.6	7.2	0.6	1.39	0
67	F	78	38	47	9	1	61	61	0	0	17	13	-4	5	12	7	9	2	-7	18	19	1	12	15	3	1	11	4	5	1	20.1	20.7	0.6	5	5.1	0.1	1.47	0
68	F	70	3	5	2	0	98	99	1	1	18	18	0	26	26	0	14	14	0	26	26	0	14	15	1	3	14	5	4	-1	22.2	22.4	0.2	6	6.2	0.2	1.97	0
69	F	75	5	4	-1	0	98	100	2	1	18	18	0	26	26	0	14	14	0	25	26	1	15	16	1	4	12	3	2	-1	22.9	22.6	-0.3	5.2	5.6	0.4	3.16	1
70	F	73	7	7	0	1	97	89	-8	0	17	18	1	25	21	-4	14	11	-3	26	23	-3	15	16	1	3	12	1	2	1	18.5	19.2	0.7	5.5	5.7	0.2	0.73	0
